# Supplementary material
Source: PubMed Central journal article supplement (PMC4248745)

24 DNA from WT, heterozygote and WIP $\Delta$ ABD littermates with primers c/d, showing  
25 a 176 bp WT and 140 bp KI band due to 36 bp deletion from exon 2 upon  
26 integration of the targeting construct.

27

28 **FIG S2** Cellularity of thymus and bone marrow from WIP $\Delta$ ABD mice. (A) Thymus  
29 cellularity, representative FACS analysis of CD4<sup>+</sup> and CD8<sup>+</sup> cells, and percent  
30 CD4<sup>+</sup> and CD8<sup>+</sup> cells in the thymi of WIP $\Delta$ ABD mice and WT controls. N=6 each  
31 group. (B) Bone marrow cellularity, representative FACS analysis of B220<sup>+</sup> and  
32 CD43<sup>+</sup> or B220<sup>+</sup> and IgM<sup>+</sup> cells, and percent pro-B, pre-B, immature, and mature  
33 B cells in the bone marrow of WIP $\Delta$ ABD mice and WT controls. N=3 each group.  
34 Columns and bars represent mean $\pm$ SEM. \*\*p<0.01. n.s., not significant.

35

36 **FIG S3** Defective *in vivo* homing of WIP $\Delta$ ABD T cells to LNs. (A) Representative  
37 FACS analysis of a mixture of equal numbers of Alexa fluor555-labeled WT T  
38 cells (designated by red lettering) and Alexa fluor488-labeled WT or WIP $\Delta$ ABD T  
39 cells (designated by green lettering) used for injection into genetically matched  
40 WT recipients. (B) Representative FACS analysis of cells from the blood and LNs  
41 of WT recipients obtained 1 h after *i.v.* administration of a 1:1 mixtures of equal  
42 numbers of Alexa fluor555-labeled WT T cells (designated by red lettering) and  
43 Alexa fluor488-labeled WT or WIP $\Delta$ ABD T cells (designated by green lettering).  
44 (C) Quantitative analysis of the homing index of WIP $\Delta$ ABD T cells relative to the  
45 mean homing index of WT T cells set at 1.0. N=5 each group. \*p<0.05.

46

47 **FIG S4** Defective CHS response to oxazolone in WIP $\Delta$ ABD mice. (A) CHS in  
48 WIP $\Delta$ ABD mice and WT controls measured as the difference in thickness  
49 between oxazolone- and vehicle-challenged ears. N=8 each group. (B)  
50 Representative ear skin histology stained with hematoxylin and eosin (H&E) 24 h  
51 post-challenge with oxazolone or vehicle, then visualized by light microscopy.  
52 Bar=50  $\mu$ m. (C) *Ifn $\gamma$*  and *Il4* mRNA expression in ears of WIP $\Delta$ ABD mice and WT  
53 controls 24 h post-challenge with oxazolone or vehicle. Data is represented as  
54 fold increase in mRNA levels relative to vehicle-challenged ears of WT mice set at  
55 1. N=8 each group. Columns or squares and bars represent mean $\pm$ SEM. \*p<0.05.

56

57 **FIG S5** Normal DC migration from the skin to the DLNs in WIP $\Delta$ ABD mice. (A)  
58 Representative FACS analysis, and percentages and numbers of CD11c<sup>+</sup>FITC<sup>+</sup>  
59 DCs in the DLNs of WIP $\Delta$ ABD mice and WT controls 24 h following shaving and  
60 painting the abdominal area with FITC or vehicle control. N=3 each group. n.d.,  
61 not detected. (B) Proliferation and secretion of IL-2, IFN- $\gamma$ , and IL-13 by naïve WT  
62 DO11.10 T cells stimulated with DCs isolated from WIP $\Delta$ ABD or WT mice 24 h  
63 following EC-sensitization with PBS or OVA, without further addition of OVA in  
64 vitro. N=4 each group. Columns and bars represent mean $\pm$ SEM. n.s., not  
65 significant.

66

67 **FIG S6** Normal homing of adoptively transferred WT T cells into sites of  
68 cutaneous Ag challenge in WIP $\Delta$ ABD recipient mice. (A) Representative FACS  
69 analysis of CD4<sup>+</sup>KJ1-26<sup>+</sup> cells in OVA- and PBS-challenged ears of WIP $\Delta$ ABD or

70 WT mice recipients of OVA-stimulated WT DO11.10 CD4<sup>+</sup> cells. (B) Percentages  
71 of CD4<sup>+</sup>KJ1-26<sup>+</sup> T cells in OVA- and PBS-challenged ears from WIP $\Delta$ ABD or WT  
72 mice recipients of OVA-stimulated WT DO11.10 CD4<sup>+</sup> cells. N=5 each group.  
73 Columns and bars represent mean $\pm$ SEM. n.s., not significant.

74

75 **Movies S1 and S2** Defective motility of T cells from WIP $\Delta$ ABD mice. Live imaging  
76 of splenic T cells from WT (Movie S1) and WIP $\Delta$ ABD (Movie S2) mice stimulated  
77 with immobilized anti-CD3 and observed over a period of 20 min.

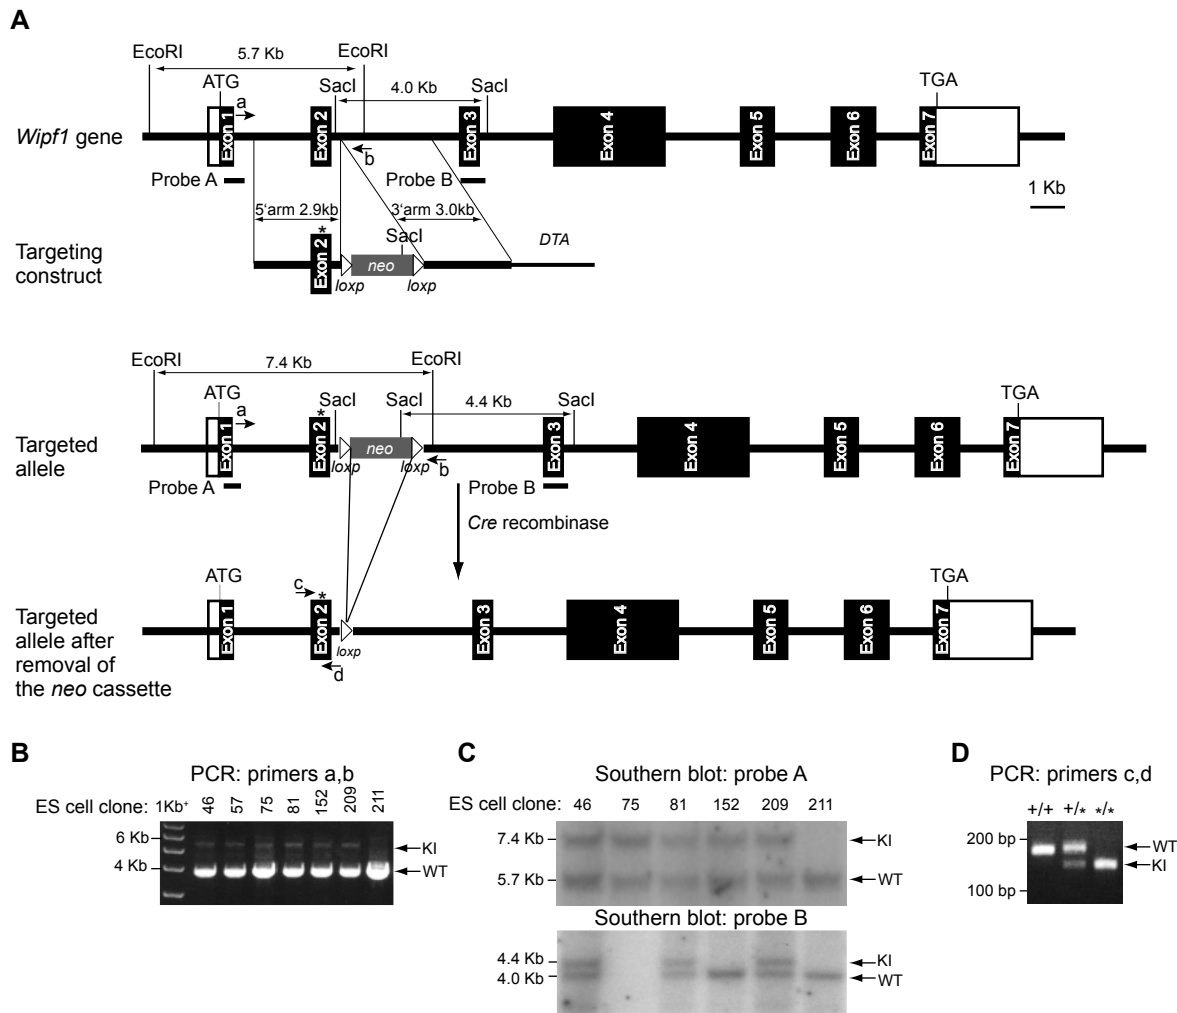

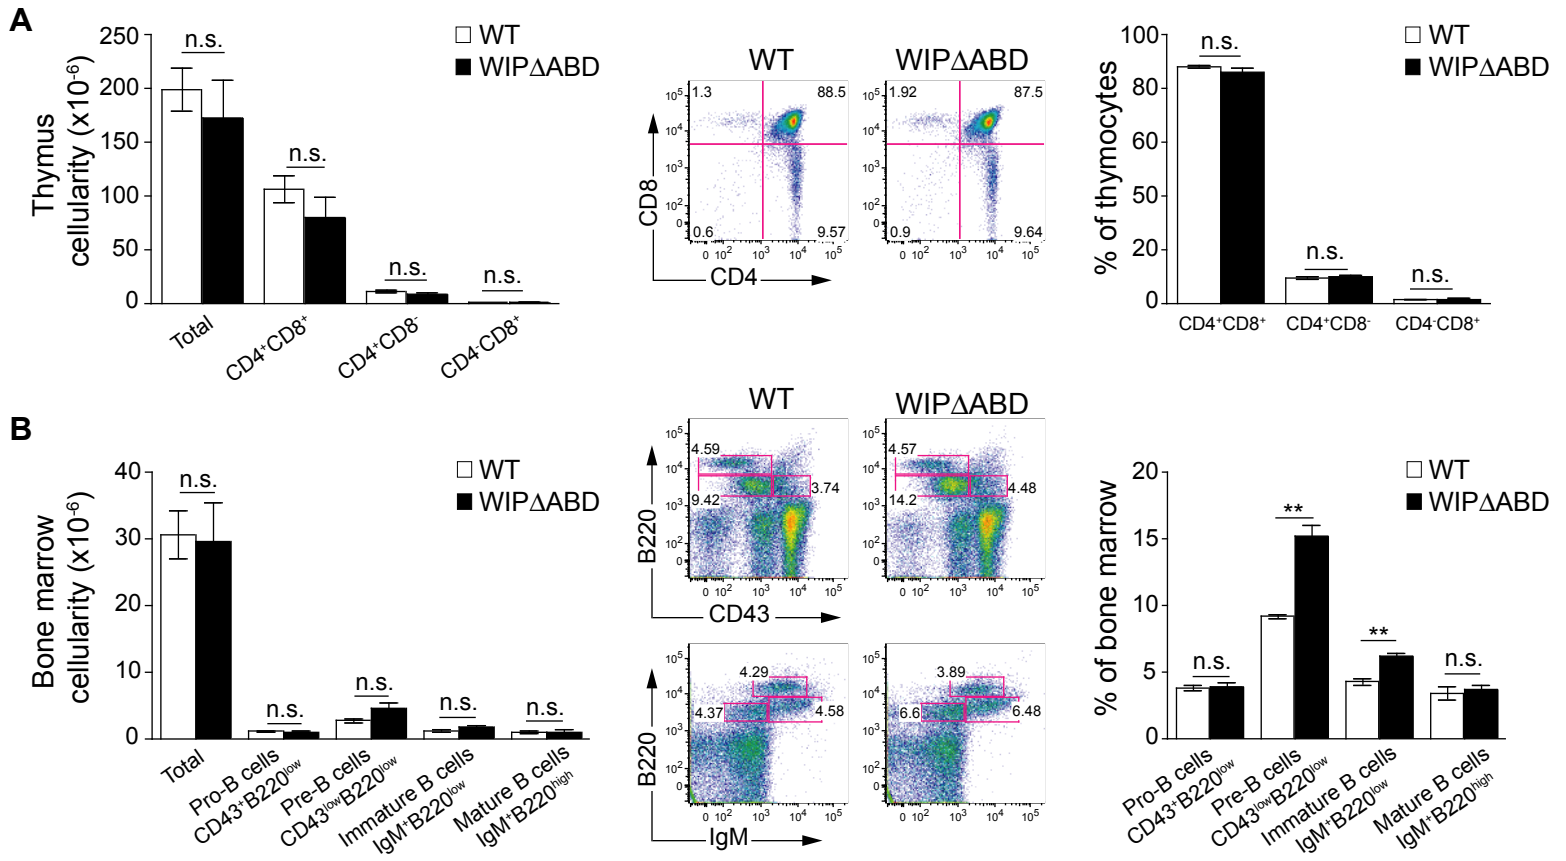

**A**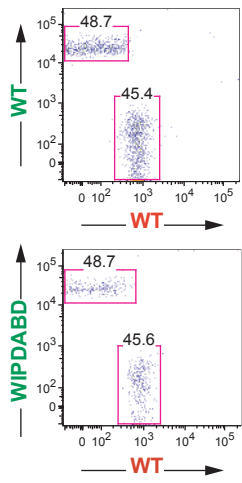**B**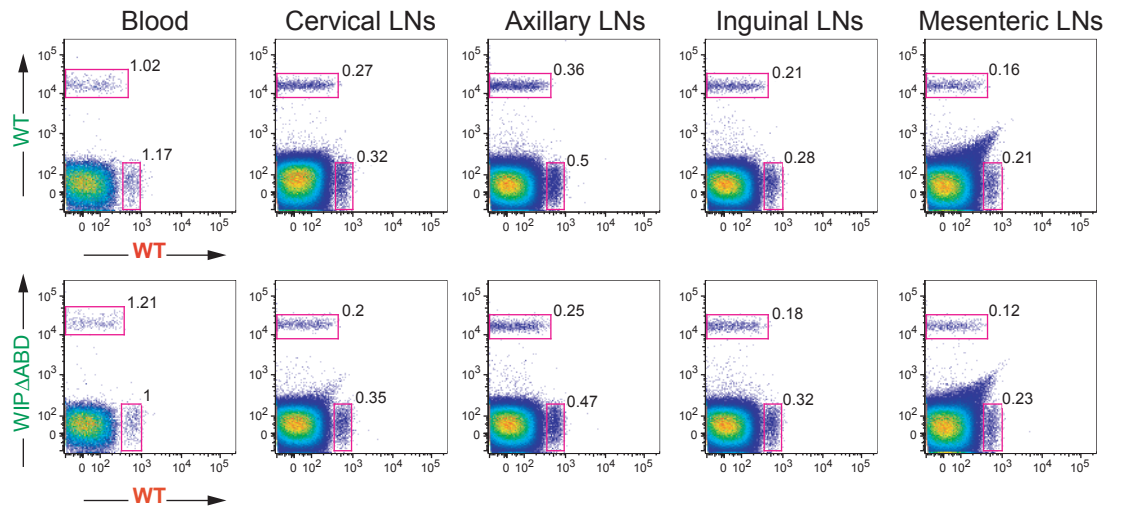**C**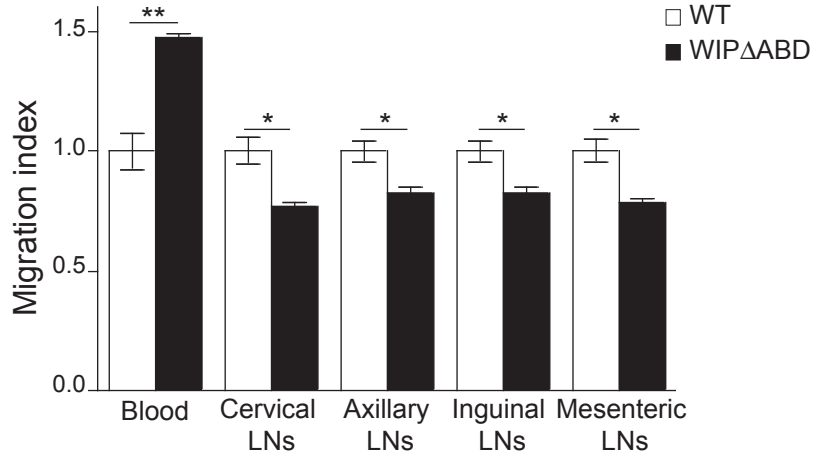

**A**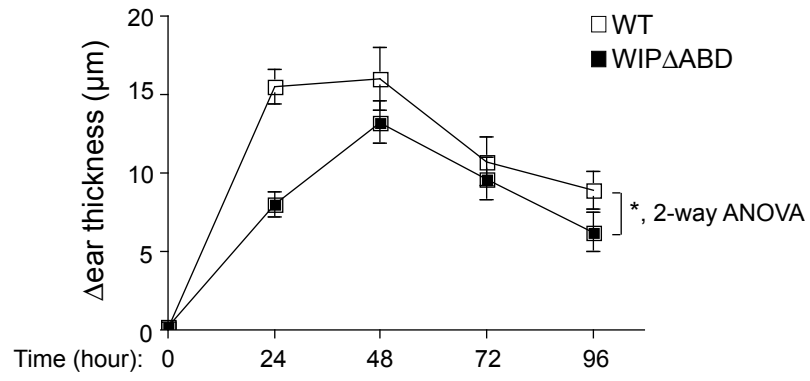**B**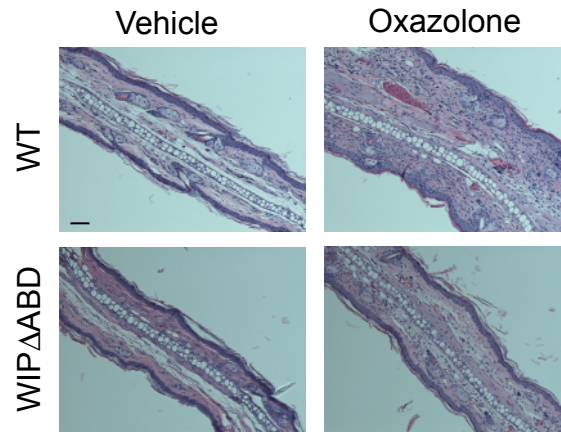**C**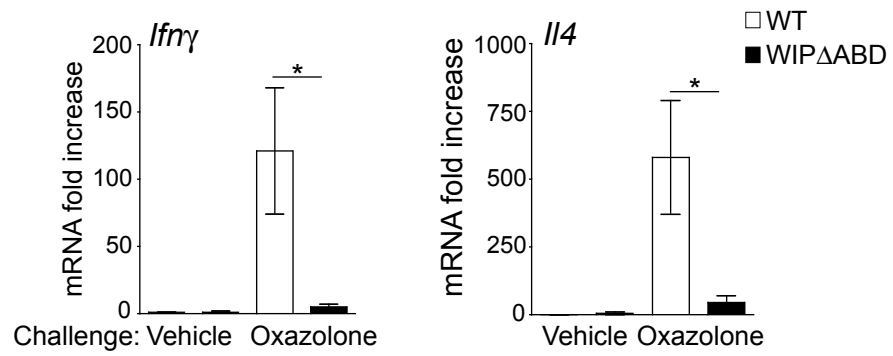



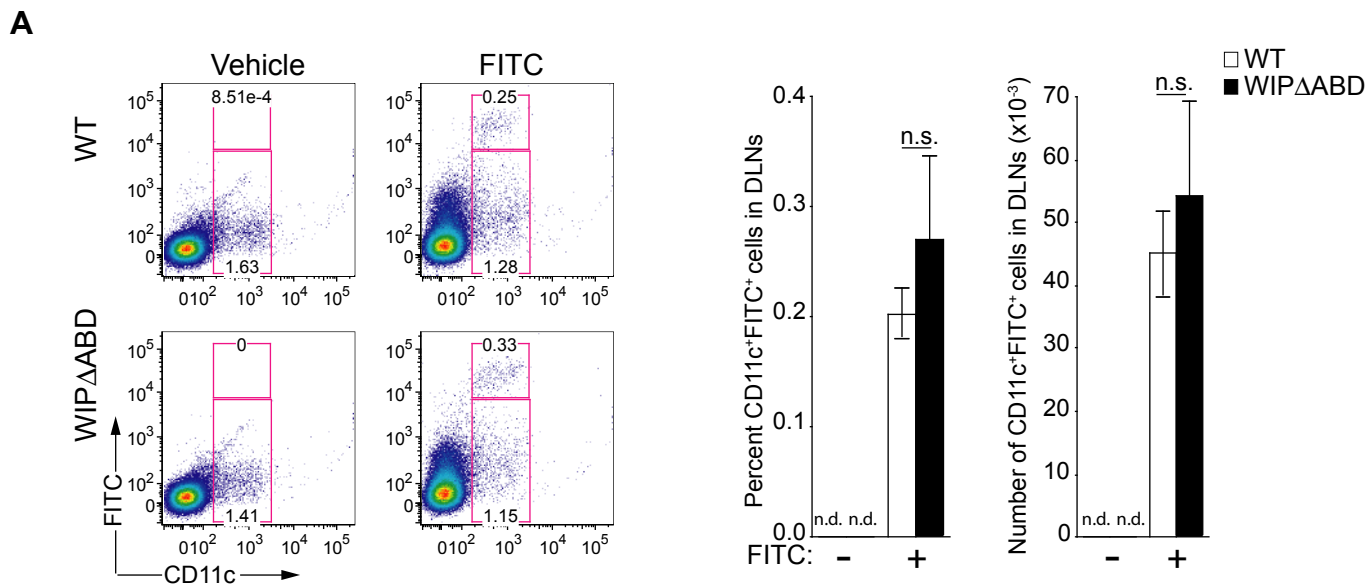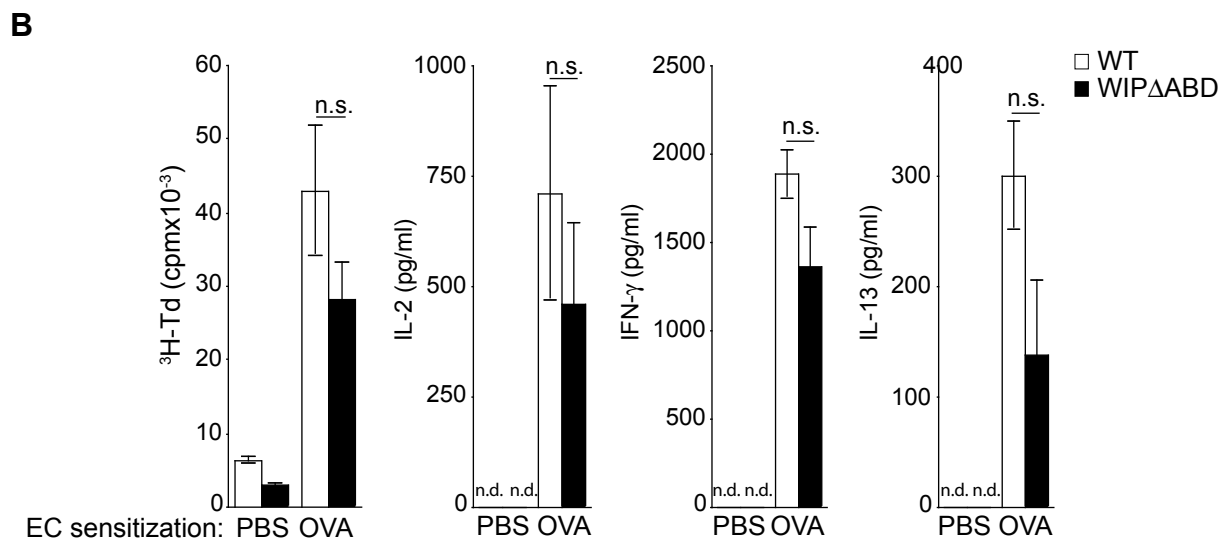

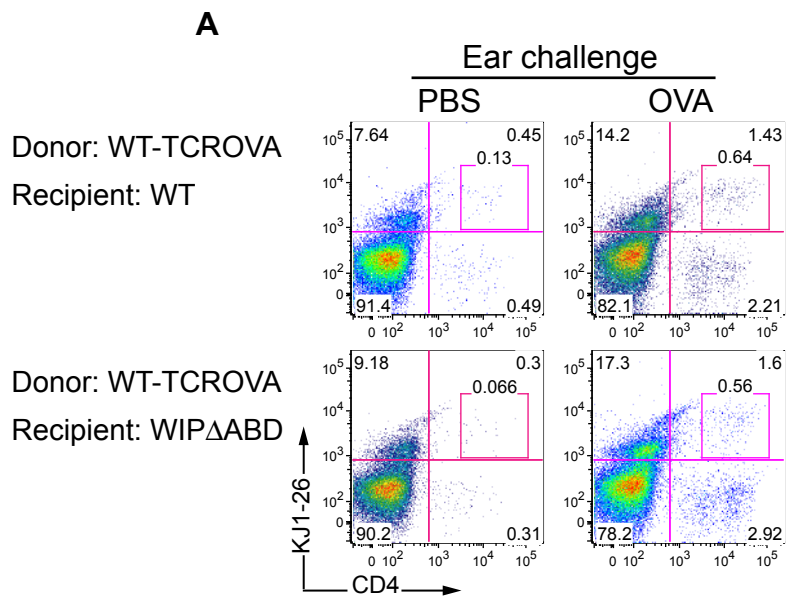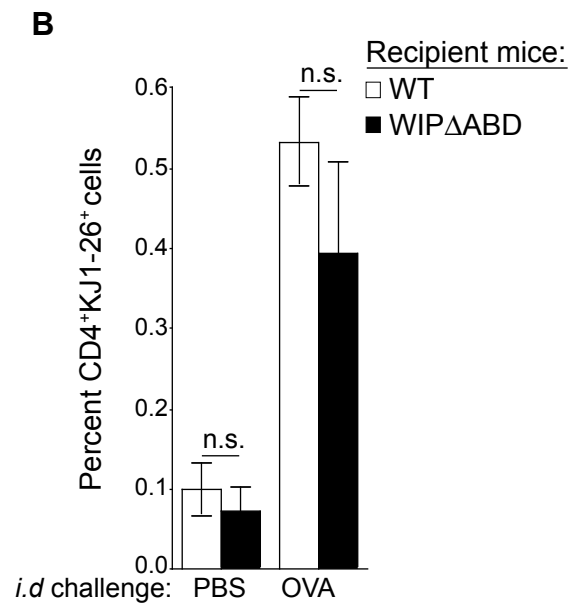

Supplement: MCB.00533-14_zmb999100647so1.pdf [file MCB.00533-14_zmb999100647so1.pdf]
